# Supplementary material
Source: MDPI journal article supplement (https://www.mdpi.com/2076-3417/10/21/7785)
Supplement: s1 [file s1]

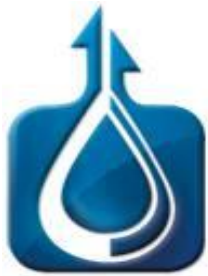

# Institute for Groundwater Studies

University of the Free State

IGS Laboratory Services, Dekaan Street (Campus)

✉ 339, BLOEMFONTEIN, 9300

☎ +27-(0)51 - 401 2317

📠: +27-(0)51 - 401 3005

E-mail: igslab@ufs.ac.za

SEC 7.8 F1

Revision 12

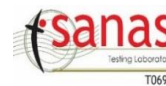

## Test Report

Case no: 2020- 086

Page 2 of 2

| Determinand                 | Date received: | 05/02/2020   | Client sample name: |        |        |        |        |        |        |
|-----------------------------|----------------|--------------|---------------------|--------|--------|--------|--------|--------|--------|
|                             | Units          | Methods used | QM 2                | QM 3   | QM 4   | QM 5   | QM 6   | QM 8   | QM 9   |
|                             |                |              | Lab number:         |        |        |        |        |        |        |
|                             |                |              | 086-1               | 086-2  | 086-3  | 086-4  | 086-5  | 086-6  | 086-7  |
|                             |                |              | Value               | Value  | Value  | Value  | Value  | Value  | Value  |
| Chemical report             |                |              |                     |        |        |        |        |        |        |
| Calcium as Ca # - no charge | mg/L           | Chem-TM02    | 13.25               | 52.34  | 22.64  | 28.50  | 23.27  | 14.35  | 49.24  |
| Magnesium as Mg #           | mg/L           | Chem-TM02    | 4.92                | 12.47  | 7.97   | 7.48   | 6.99   | 1.29   | 13.03  |
| Sodium as Na #              | mg/L           | Chem-TM02    | 7.77                | 80.83  | 14.97  | 26.22  | 28.99  | 49.68  | 18.64  |
| Potassium as K #            | mg/L           | Chem-TM02    | 2.89                | 2.77   | 4.41   | 7.78   | 8.56   | 1.42   | 1.74   |
| Cadmium as Cd #             | mg/L           | Chem-TM02    | <0.003              | <0.003 | <0.003 | <0.003 | <0.003 | <0.003 | <0.003 |
| Copper as Cu #              | mg/L           | Chem-TM02    | 0.008               | 0.005  | 0.008  | 0.013  | 0.011  | <0.005 | 0.005  |
| Lead as Pb #                | mg/L           | Chem-TM02    | <0.015              | <0.015 | <0.015 | <0.015 | <0.015 | <0.015 | <0.015 |
| Silver as Ag #              | mg/L           | Chem-TM02    | <0.020              | <0.020 | <0.020 | <0.020 | <0.020 | <0.020 | <0.020 |
| Zinc as Zn #                | mg/L           | Chem-TM02    | <0.020              | <0.020 | <0.020 | <0.020 | <0.020 | 0.217  | <0.020 |
| Bacterial report:           |                |              |                     |        |        |        |        |        |        |
| Faecal coliform             | MPN/100ml      | BAC-TM02     | 1414                | 1      | >2420  | >2420  | 1986   | <1     | <1     |
| E. coli #                   | MPN/100ml      | BAC-TM02     | 980                 | <1     | >2420  | 1553   | 1553   | <1     | <1     |

### Comments:

Results marked with (#) in this report, are not included in the SANAS Schedule of Accreditation for this laboratory.

Bacteriological results obtained from samples older than the prescribed 24 hours may be inaccurate.

Data marked with blue dollar signs (\$) is provided by the customer.

MPN = cfu

(BAC-TM02) - no growth reported as <1

Amendment reason: N/A

Signature: \_\_\_\_\_

Dr L Deysel (Technical signatory / Technical manager)

END OF REPORT
